# Supplementary material
Source: publisher figshare collection journal article supplement (https://acs.figshare.com/ndownloader/files/4476370)
Supplement: Supplementary file 1 [file 4476370]

## Supporting Information for

### Energetics and Mechanism for the Deamination of Lithiated Cysteine

by P. B. Armentrout,\* Amy Gabriel, and Robert M. Moision

Figure showing the transition states for deamination of  $\text{Li}^+(\text{Cys})$  discussed in the main text. Species are identified by the transformation discussed in the text along with the energies (in kJ/mol) relative to the  $\text{Li}^+(\text{Cys})$  [N,CO,S] tggg<sub>+</sub> ground state reactants calculated at the B3LYP, B3P86, and MP2(full) levels of theory using the 6-311+G(2d,2p) basis set and geometries and vibrational frequencies calculated at a B3LYP/6-311G(d,p) level of theory. The imaginary frequency (unscaled) in  $\text{cm}^{-1}$  is also indicated.

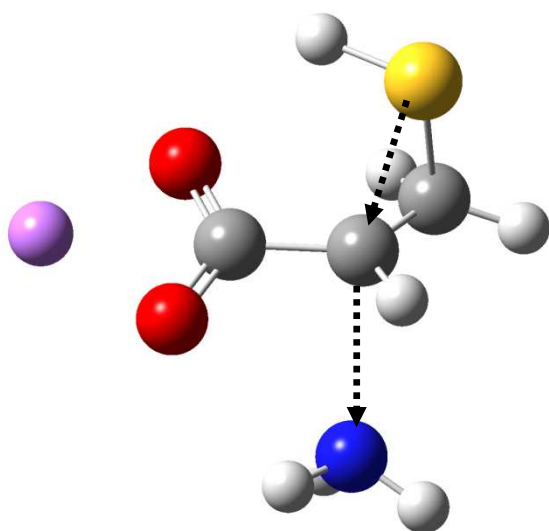

$\text{Li}^+(\text{Cys}) [\text{CO}_2^-] \text{ctg}_+\text{g}_- \rightarrow$   
 $(\text{NH}_3)\text{Li}^+(\text{Tica}) [\text{CO}_2^-] \text{cc}$   
143.0, 151.7, 156.9 kJ/mol  
-175  $\text{cm}^{-1}$

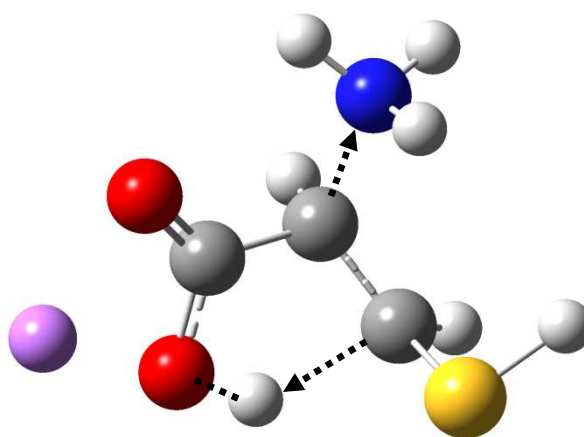

$\text{Li}^+(\text{Cys}) [\text{CO}_2^-] \text{ctg}_-\text{g}_- \rightarrow$   
 $(\text{NH}_3)\text{Li}^+(\text{Tpa}) [\text{CO},\text{S}] \text{ttct}$   
253.3, 249.7, 265.4  
-663  $\text{cm}^{-1}$

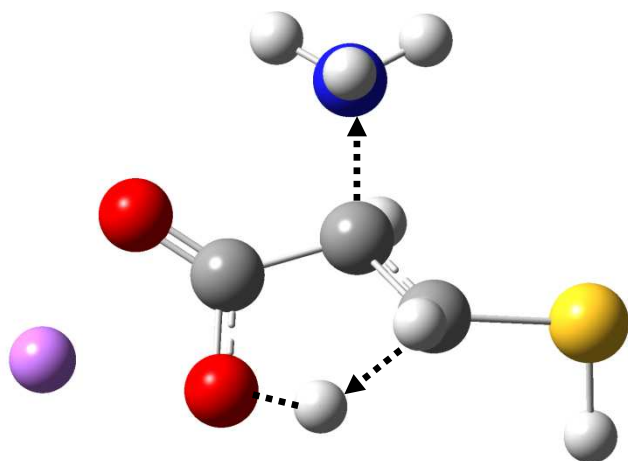

$\text{Li}^+(\text{Cys}) [\text{CO}_2^-] \text{cgtg} \rightarrow$   
 $(\text{NH}_3)\text{Li}^+(\text{Tpa}) [\text{CO}]\text{tctc}$   
 255.0, 252.8, 273.4 kJ/mol  
 -1062  $\text{cm}^{-1}$

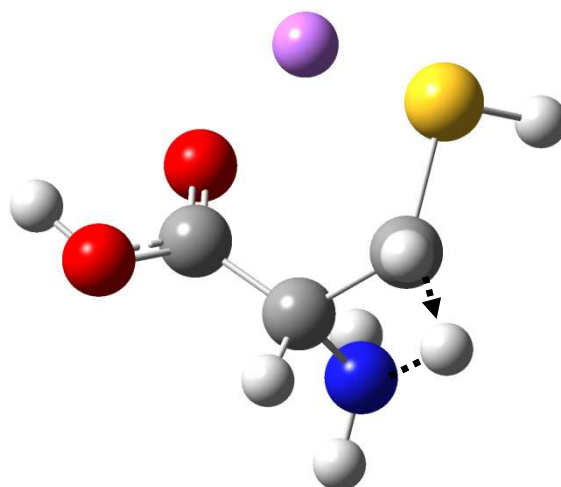

$\text{Li}^+(\text{Cys}) [\text{CO},\text{S}] \text{ttgt} \rightarrow$   
 $(\text{NH}_3)\text{Li}^+(\text{Tpa}) [\text{CO},\text{S}] \text{ttct}$   
 281.2, 275.8, 300.6 kJ/mol  
 -1436  $\text{cm}^{-1}$

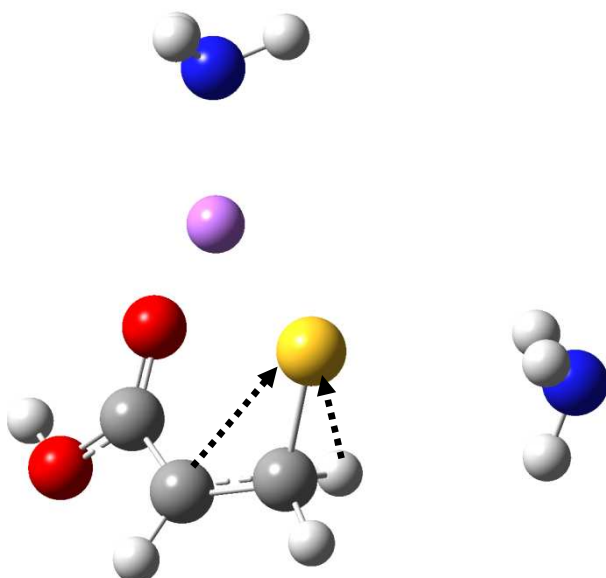

$(\text{NH}_3)\text{Li}^+(\text{Tica}) [\text{CO},\text{S}]\text{tg} \rightarrow$   
 $(\text{NH}_3)\text{Li}^+(\text{Tpa}) [\text{CO},\text{S}]\text{ttct}$   
 206.1, 235.0, 275.4 kJ/mol  
 -783  $\text{cm}^{-1}$

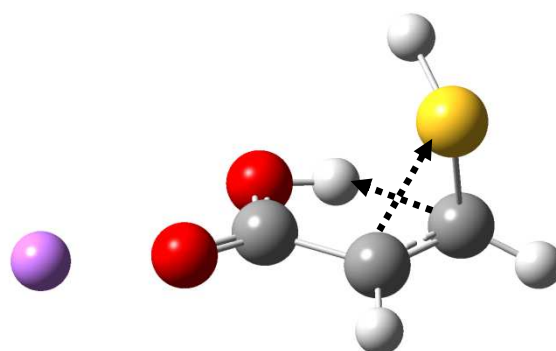

$(\text{NH}_3)\text{Li}^+(\text{Tica}) [\text{CO}_2^-] \text{cc} \rightarrow$   
 $(\text{NH}_3)\text{Li}^+(\text{Tpa}) [\text{CO}] \text{ccct}$   
 237.8, 250.8, 271.2 kJ/mol  
 -578  $\text{cm}^{-1}$
